# Supplementary material
Source: PubMed Central journal article supplement (PMC3948803)
Supplement: 3e9106323bff5863d7efc564bd3c8919_genetics.113.159368-5.pdf [file 3e9106323bff5863d7efc564bd3c8919_genetics.113.159368-5.pdf]

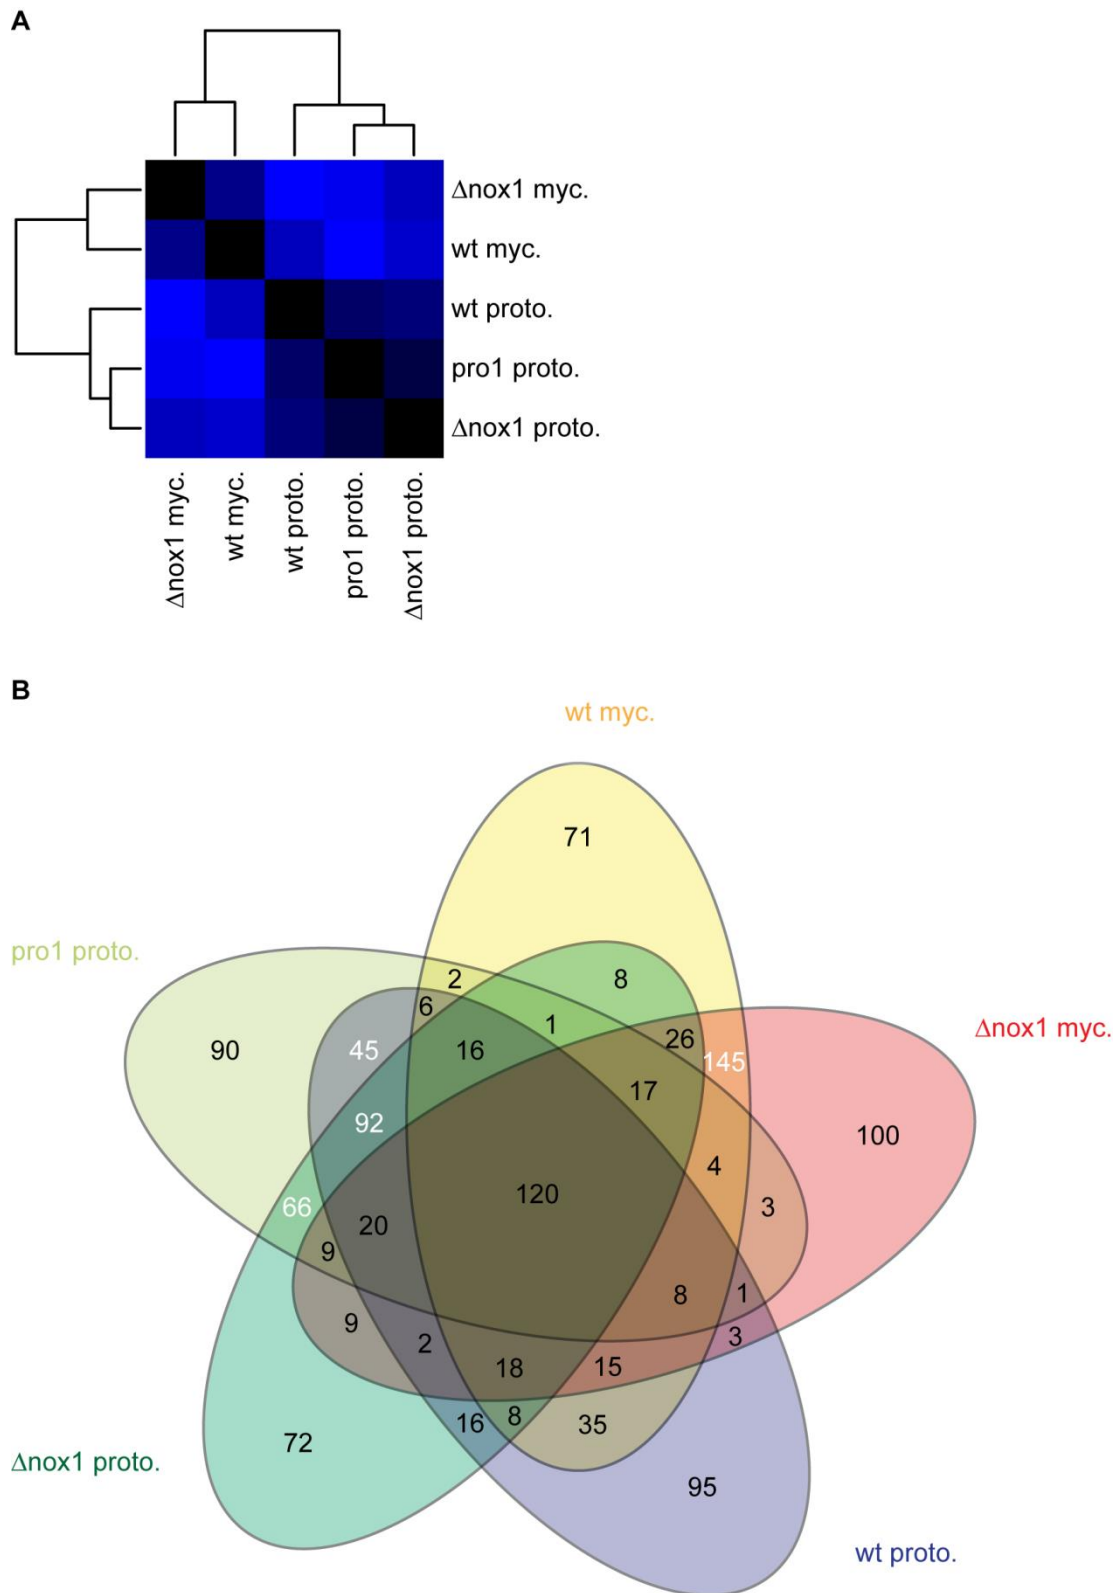

**Figure S6** Expression patterns of protoperithelia are distinct from total mycelial samples. (A) Heatmap of correlation coefficients (Spearman) calculated from normalized read counts for classical analysis from protoperithelial (proto.) and mycelial (myc.) samples. Clustering and heatmap were done in R. (B) Venn diagrams of top 500 genes in different samples. Numbers of genes that are in the top 500 group for one or more or the five samples are given. In this analysis, only reads that map within 100 to 400 bases from the 3' end of the mRNA were used to account for the 3' bias in the microdissection samples and different mRNA lengths. Numbers for the four intersections containing the highest numbers of genes are indicated in white (not counting fields that represent genes occurring in all or only in one group). These intersections are wt mycelia and  $\Delta$ nox1 mycelia (145), wt protoperithelia and  $\Delta$ nox1 protoperithelia and pro1 protoperithelia (92),  $\Delta$ nox1 protoperithelia and pro1 protoperithelia (66), and wt protoperithelia and pro1 protoperithelia (45).
