# Supplementary material
Source: PubMed Central journal article supplement (PMC3948803)
Supplement: 5cb88eb0513beef80cf0e896195c02b9_genetics.113.159368-15.pdf [file 5cb88eb0513beef80cf0e896195c02b9_genetics.113.159368-15.pdf]

**Table S2 Summary of sequence reads generated with RNA-seq analysis in this study**

| Condition                     | Sample | No. of reads | No. of reads mapped to reference genome | % of reads mapped to reference genome |
|-------------------------------|--------|--------------|-----------------------------------------|---------------------------------------|
| wild type sexual mycelium     | SM10   | 43,457,800   | 40,739,279                              | 93.7                                  |
| $\Delta$ nox1 sexual mycelium | SM12   | 48,567,244   | 46,076,199                              | 95.1                                  |
|                               | SM15   | 58,330,616   | 55,736,653                              | 95.6                                  |
| $\Delta$ nox1 protoperithecia | SM16   | 71,689,682   | 65,226,730                              | 91.0                                  |
|                               | SM17   | 65,178,132   | 60,057,518                              | 92.1                                  |
