# Supplementary material
Source: PubMed Central journal article supplement (PMC3948803)
Supplement: 7f583e6ac46668ed3519259d9effabed_genetics.113.159368-13.pdf [file 7f583e6ac46668ed3519259d9effabed_genetics.113.159368-13.pdf]

**Table S4 Differentially regulated genes in  $\Delta$ nox1 protoperithecia compared to wild type protoperithecia with an impact on sexual development in *N. crassa***

| <i>S. macrospora</i> locus tag                                                       | <i>N. crassa</i> locus tag | Gene designation | Gene product                                  | Phenotype of <i>N. crassa</i> deletion mutant                        |
|--------------------------------------------------------------------------------------|----------------------------|------------------|-----------------------------------------------|----------------------------------------------------------------------|
| upregulated in $\Delta$ nox1 protoperithecia compared to wild type protoperithecia   |                            |                  |                                               |                                                                      |
| SMAC_00047                                                                           | NCU_08726                  | <i>fl</i>        | transcription factor fluffy                   | sterile <sup>a</sup>                                                 |
| SMAC_00190                                                                           | NCU00911                   | <i>cps1</i>      | Polysaccharide synthase<br>Cps1p              | sterile, reduced growth <sup>a</sup>                                 |
| SMAC_00609                                                                           | NCU02833                   | <i>ham-10</i>    | Hyphal anastomosis-10                         | sterile, reduced growth, cell fusion deficient <sup>b</sup>          |
| SMAC_02227                                                                           | NCU00202                   | <i>crn</i>       | Coronin-1                                     | sterile, reduced growth, no polarity during germination <sup>c</sup> |
| SMAC_02283                                                                           | NCU00138                   | <i>pre-1</i>     | Pheromone receptor-1                          | female sterile <sup>d</sup>                                          |
| SMAC_02450                                                                           | NCU01765                   | <i>nuo78</i>     | NADH:ubiquinone oxidoreductase 78             | Reduced perithecia formation, no ascospore production <sup>e</sup>   |
| SMAC_04395                                                                           | NCU04198                   | <i>cac-1</i>     | Chromatin assembly-1                          | Sterile, reduced growth <sup>a</sup>                                 |
| SMAC_05401                                                                           | NCU01958                   | <i>matA-1</i>    | Mating type protein A-1                       | sterile, heterokaryon compatible <sup>f</sup>                        |
| SMAC_05403                                                                           | NCU01960                   | <i>matA-3</i>    | Mating type protein A-3                       | few ascospores formed <sup>g</sup>                                   |
| SMAC_05824                                                                           | NCU02534                   | <i>nuo49</i>     | NADH:ubiquinone oxidoreductase 49             | Sterile, reduced growth <sup>e</sup>                                 |
| SMAC_06177                                                                           | NCU04001                   | <i>ff-7</i>      | Transcription factor female fertility-7       | sterile <sup>a</sup>                                                 |
| SMAC_06684                                                                           | NCU00272                   | <i>cul-4</i>     | Cullin-4                                      | sterile, reduced growth <sup>a</sup>                                 |
| SMAC_07314                                                                           | NCU07622                   |                  | Putative GTPase activating protein            | sterile <sup>a</sup>                                                 |
| SMAC_08994                                                                           | NCU05758                   | <i>pre-2</i>     | Pheromone receptor-2                          | sterile, no ascospore formation <sup>a</sup>                         |
| downregulated in $\Delta$ nox1 protoperithecia compared to wild type protoperithecia |                            |                  |                                               |                                                                      |
| SMAC_00010                                                                           | NCU10142                   |                  | Putative heterokaryon incompatibility protein | sterile <sup>a</sup>                                                 |
| SMAC_00177                                                                           | NCU09211                   | <i>sad-3</i>     | Suppressor of ascus dominance-3               | no ascospore production <sup>h</sup>                                 |
| SMAC_01666                                                                           | NCU09915                   | <i>fsd-1</i>     | Female sexual development-1                   | sterile, defect in ascospore                                         |

|            |          |               |                                                |                                                                        |
|------------|----------|---------------|------------------------------------------------|------------------------------------------------------------------------|
| SMAC_02093 | NCU07816 |               | Putative magnesium and cobalt transporter CorA | maturation <sup>a</sup><br>sterile <sup>a</sup>                        |
| SMAC_02094 | NCU07817 | <i>ncw-3</i>  | Non-anchored cell wall protein-3               | sterile, reduced growth <sup>a</sup>                                   |
| SMAC_06479 | NCU00340 | <i>pp-1</i>   | protoperithecium-1                             | sterile, reduced growth, ascospore germination defect <sup>i</sup>     |
| SMAC_07309 | NCU07617 | <i>acon-3</i> | Aconidiate-3                                   | sterile <sup>a</sup>                                                   |
| SMAC_07994 | NCU08227 |               | Putative glycosyl hydrolase                    | sterile <sup>a</sup>                                                   |
| SMAC_08793 | NCU08739 |               | endothiaepsin                                  | sterile, reduced growth <sup>a</sup>                                   |
| SMAC_12613 | NCU07172 | <i>stk-8</i>  | Serine/threonine protein kinase-8              | sterile, reduced growth, defective in conidia development <sup>j</sup> |

---

<sup>a</sup>*Neurospora crassa* Sequencing Project, Broad Institute of Harvard and MIT (<http://www.broadinstitute.org/>); <sup>b</sup>(Fu *et al.* 2011); <sup>c</sup>(Echauri-Espinosa *et al.* 2012); <sup>d</sup>(Kim and Borkovich 2004); <sup>e</sup>(Tanida 2011); <sup>f</sup>(Glass and Lee 1992); <sup>g</sup>(Ferreira *et al.* 1998); <sup>h</sup>(Hammond *et al.* 2012); <sup>i</sup>(Li *et al.* 2005); <sup>j</sup>(Park *et al.* 2011)
