# Supplementary material
Source: PubMed Central journal article supplement (PMC3948803)
Supplement: 0252a5678552cff638c706fd579f4475_genetics.113.159368-14.pdf [file 0252a5678552cff638c706fd579f4475_genetics.113.159368-14.pdf]

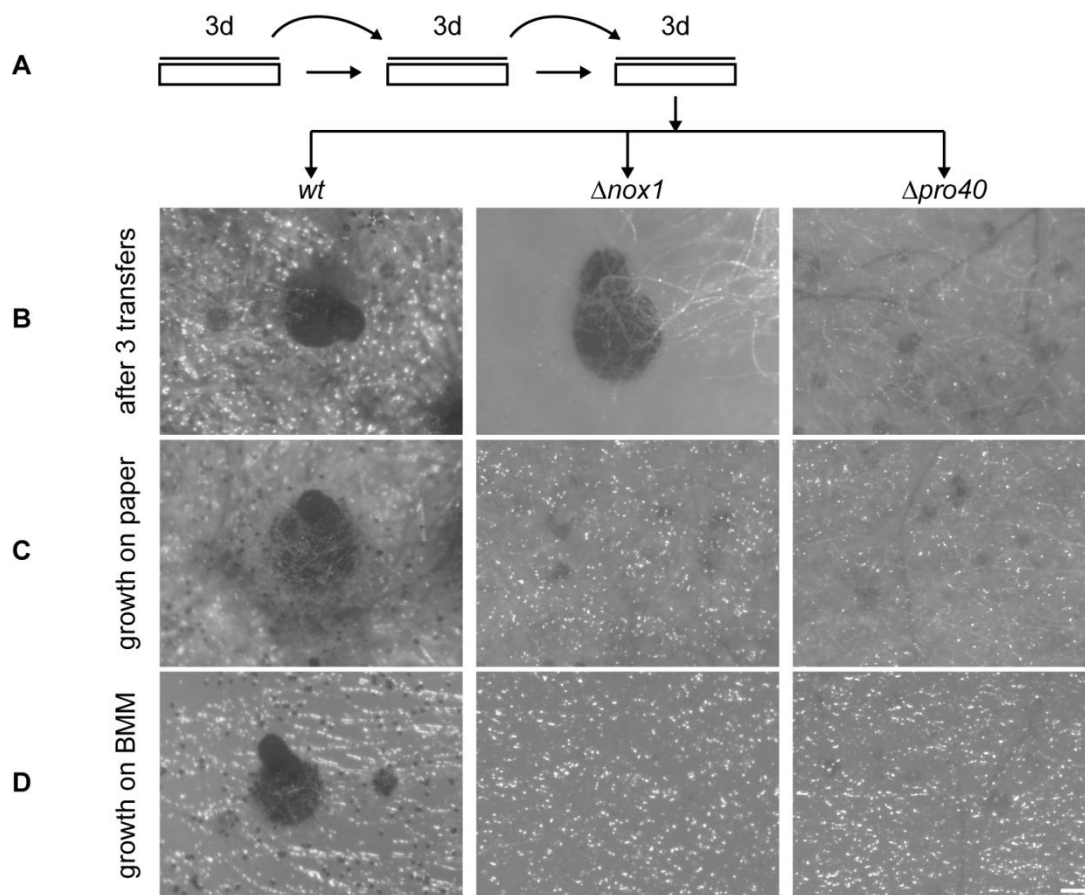

**Figure S5** Restoration of  $\Delta nox1$  fertility by a serial transfer to BMM medium. (A) Scheme to demonstrate the serial transfer of surface cultures on BMM medium. Strains were grown for 3 d on filter papers and subsequently transferred to fresh BMM media; (B) Growth of strains as indicated after 9 d. Serial transfers were done as depicted in (A); (C) Strains were grown for 9 d on filter papers layered on BMM medium; (D) Same as (C) without filter papers
