# Supplementary material
Source: PubMed Central journal article supplement (PMC3948803)
Supplement: 473ba9303b1332bf61b862845be010ee_genetics.113.159368-8.pdf [file 473ba9303b1332bf61b862845be010ee_genetics.113.159368-8.pdf]

**Table S1 Summary of sequence reads generated from mutant and wild type samples**

| Sample    | Total no. of reads | Read length in bases | Total MB | Coverage | No. of reads mapped to reference genome | % of reads mapped to reference genome |
|-----------|--------------------|----------------------|----------|----------|-----------------------------------------|---------------------------------------|
| wt_3      | 108,513,967        | 51                   | 5534     | 134x     | 105,047,645                             | 96.8                                  |
| pro32/fus | 91,404,127         | 51                   | 4662     | 114x     | 89,264,279                              | 97.7                                  |
