# Supplementary material
Source: PubMed Central journal article supplement (PMC3948803)
Supplement: 580a84f83997801c3840aa2019b5c838_genetics.113.159368-1.pdf [file 580a84f83997801c3840aa2019b5c838_genetics.113.159368-1.pdf]

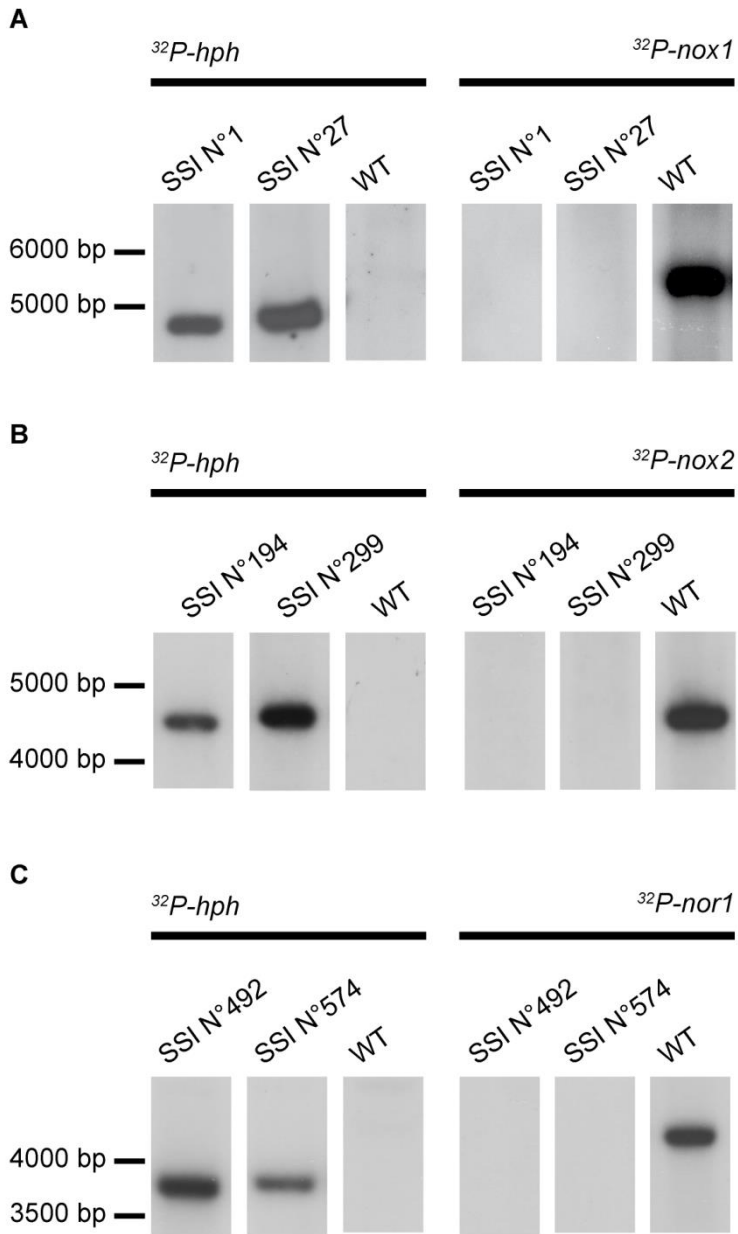

**Figure S3** Southern hybridisation of single spore isolates (SSI) to verify the deletion of *nox1* (A), *nox2* (B) and *nor1* (C) mutants. Samples were hybridized with *hph* or gene-specific probes as indicated.
