# Supplementary material
Source: PubMed Central journal article supplement (PMC3948803)
Supplement: c8e4234cb2beffd8e38bee6032bbd11b_genetics.113.159368-4.pdf [file c8e4234cb2beffd8e38bee6032bbd11b_genetics.113.159368-4.pdf]

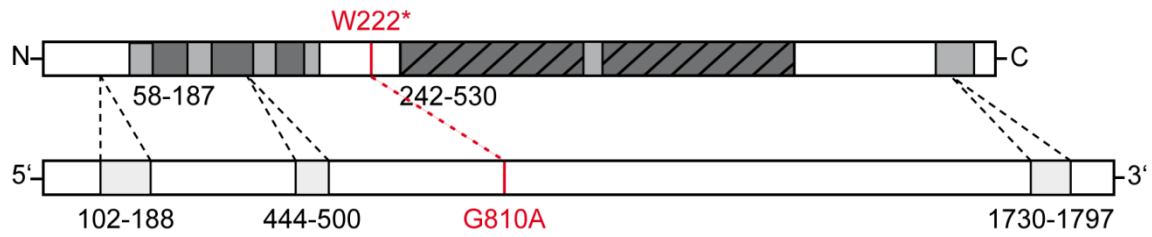

**Figure S1** Structure of the *nox1* gene and derived protein. The 1874 bp gene contains three introns (light grey boxes) and the predicted mature mRNA encodes a protein of 645 aa, containing a highly conserved ferric reductase-like domain at the N-terminus (dark grey boxes), a ferredoxin reductase like domain (striped dark grey boxes) and six predicted transmembrane domains (light grey boxes). A G810A mutation in sterile mutant pro32 leads to a translational stop at position 222 of the NOX1 protein, resulting in a severely truncated NOX1 lacking the ferredoxin reductase-like domain.
