# Supplementary material
Source: PubMed Central journal article supplement (PMC3948803)
Supplement: d130c061cc5e4b673c5be19dddef0fbf_genetics.113.159368-9.pdf [file d130c061cc5e4b673c5be19dddef0fbf_genetics.113.159368-9.pdf]

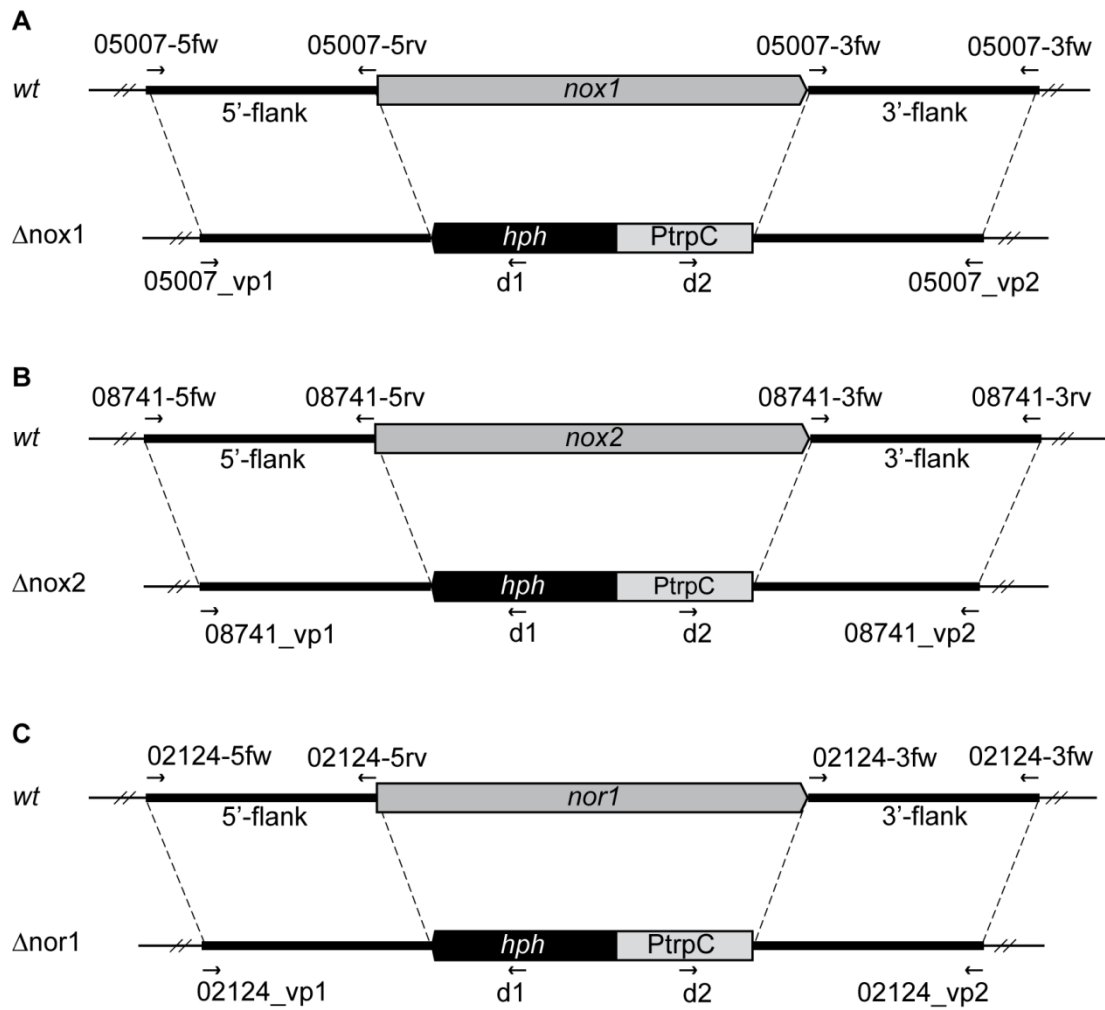

**Figure S2** Genomic organization of *nox1* (A), *nox2* (B) and *nor1* (C) loci in wild type and deletion mutants. Primers used for PCR (Table 2) are indicated with small arrows.
