# Supplementary material
Source: PubMed Central journal article supplement (PMC3948803)
Supplement: d461a89bc4cb9689bc335408ea57cf61_genetics.113.159368-6.pdf [file d461a89bc4cb9689bc335408ea57cf61_genetics.113.159368-6.pdf]

**Table S3 Cellular functions of differentially regulated genes in  $\Delta$ nox1 protoperithecia compared to wild type protoperithecia**

| Direction of regulation                                               | <i>S. macrospora</i> locus tag | Gene designation                     | Cellular function of the corresponding protein in several organisms                                                                                                           |                                                             |
|-----------------------------------------------------------------------|--------------------------------|--------------------------------------|-------------------------------------------------------------------------------------------------------------------------------------------------------------------------------|-------------------------------------------------------------|
| Genes involved in cytoskeleton remodeling and hyphal fusion           |                                |                                      |                                                                                                                                                                               |                                                             |
| Upregulated                                                           | SMAC_00609                     | <i>ham-10</i>                        | Hyphal fusion <sup>a</sup>                                                                                                                                                    |                                                             |
|                                                                       | SMAC_00958                     | <i>profilin</i>                      | Profilin binds actin monomers <sup>b</sup>                                                                                                                                    |                                                             |
|                                                                       | SMAC_02216                     | <i>cdc42</i>                         | Regulation of septin <sup>c</sup> , STE20 <sup>d</sup> , NoxA localization <sup>e</sup> , leads to actin assembly and polarized growth in response to pheromones <sup>f</sup> |                                                             |
|                                                                       | SMAC_02227                     | <i>crn-1</i>                         | Establishment of polarity, growth and stable Spitzenkörper <sup>g</sup>                                                                                                       |                                                             |
|                                                                       | SMAC_02633                     | <i>rts-1</i>                         | Bud growth, accumulation of G1 cyclin <sup>h</sup>                                                                                                                            |                                                             |
|                                                                       | SMAC_04679                     | <i>rdi1</i>                          | Recycling of CDC42 <sup>i</sup>                                                                                                                                               |                                                             |
|                                                                       | SMAC_05207                     | <i>las17</i>                         | Stabilization of actin patches (endocytosis) <sup>b</sup>                                                                                                                     |                                                             |
|                                                                       | SMAC_07118                     | <i>dynactin 6</i>                    | Active transport along the microtubules <sup>j</sup>                                                                                                                          |                                                             |
|                                                                       | SMAC_04212                     | <i>kinesin</i>                       | Active transport along the microtubules <sup>j</sup>                                                                                                                          |                                                             |
|                                                                       | SMAC_06372                     | <i>kinesin</i>                       | Active transport along the microtubules <sup>j</sup>                                                                                                                          |                                                             |
|                                                                       | SMAC_07150                     | <i>kinesin</i>                       | Active transport along the microtubules <sup>j</sup>                                                                                                                          |                                                             |
|                                                                       | SMAC_07711                     | <i>kinesin</i>                       | Active transport along the microtubules <sup>j</sup>                                                                                                                          |                                                             |
|                                                                       | Downregulated                  | SMAC_01612                           | <i>rax1</i>                                                                                                                                                                   | Bipolar budding of diploid cells <sup>k</sup>               |
|                                                                       |                                | SMAC_02720                           | <i>rsr1/bud1</i>                                                                                                                                                              | Localization <sup>l</sup> and regulation <sup>m</sup> CDC42 |
| SMAC_02963                                                            |                                | <i>cbk1</i>                          | Septum disruption after cell division <sup>n</sup>                                                                                                                            |                                                             |
| SMAC_05949                                                            |                                | <i>bem3</i>                          | GAP of CDC42 <sup>o</sup>                                                                                                                                                     |                                                             |
| SMAC_09273                                                            |                                | <i>cofilin</i>                       | De-polymerization of actin filaments <sup>p</sup>                                                                                                                             |                                                             |
| Genes involved in ubiquitin mediated protein degradation or autophagy |                                |                                      |                                                                                                                                                                               |                                                             |
| Upregulated                                                           | SMAC_01774                     | <i>ubiquitin-activating E1 1</i>     | Ubiquitin binding <sup>q</sup>                                                                                                                                                |                                                             |
|                                                                       | SMAC_03099                     | <i>ubiquitin-conjugating E</i>       | Ubiquitin binding <sup>q</sup>                                                                                                                                                |                                                             |
|                                                                       | SMAC_05013                     | <i>ubiquitin-conjugating E2 13</i>   | Ubiquitin binding <sup>q</sup>                                                                                                                                                |                                                             |
|                                                                       | SMAC_05407                     | <i>apc5</i>                          | Protein degradation <sup>r</sup>                                                                                                                                              |                                                             |
|                                                                       | SMAC_05726                     | <i>pex4</i>                          | Ubiquitin binding <sup>q</sup>                                                                                                                                                |                                                             |
|                                                                       | SMAC_06684                     | <i>cul-4</i>                         | Protein degradation <sup>r</sup>                                                                                                                                              |                                                             |
|                                                                       | SMAC_06747                     | <i>ubiquitin-protein ligase gene</i> | Ubiquitin binding <sup>q</sup>                                                                                                                                                |                                                             |
| Downregulated                                                         | SMAC_06998                     | <i>atg12</i>                         | Autophagosome formation <sup>s</sup>                                                                                                                                          |                                                             |
| Genes involved in sexual development                                  |                                |                                      |                                                                                                                                                                               |                                                             |
| Upregulated                                                           | SMAC_00047                     | <i>fl</i>                            | Transcription factor <sup>t</sup>                                                                                                                                             |                                                             |
|                                                                       | SMAC_02283                     | <i>pre-1</i>                         | Pheromone receptor <sup>u</sup>                                                                                                                                               |                                                             |
|                                                                       | SMAC_05401                     | <i>SmtA-1</i>                        | Mating type factor <sup>v</sup>                                                                                                                                               |                                                             |

|                                                   |            |                                        |                                                                              |
|---------------------------------------------------|------------|----------------------------------------|------------------------------------------------------------------------------|
|                                                   | SMAC_05403 | <i>SmtA-3</i>                          | Mating type factor <sup>v</sup>                                              |
| Downregulated                                     | SMAC_06479 | <i>ste12</i>                           | Ascospore germination <sup>w</sup>                                           |
| Genes involved in mitochondrial respiratory chain |            |                                        |                                                                              |
| Upregulated                                       | SMAC_01349 | <i>nuo9.5</i>                          | Subunit of complex I (mitochondrial respiration) <sup>x</sup>                |
|                                                   | SMAC_02450 | <i>nuo78</i>                           | Subunit of complex I (mitochondrial respiration) <sup>x</sup>                |
|                                                   | SMAC_04043 | <i>nuo11.5</i>                         | Subunit of complex I (mitochondrial respiration) <sup>x</sup>                |
|                                                   | SMAC_04093 | <i>cytochrome-c oxidase chain VIIc</i> | Cytochrome c oxidase of complex III (mitochondrial respiration) <sup>y</sup> |
|                                                   | SMAC_05824 | <i>nuo49</i>                           | Subunit of complex I (mitochondrial respiration) <sup>x</sup>                |
|                                                   | SMAC_07036 | <i>nuo10.4</i>                         | Subunit of complex I (mitochondrial respiration) <sup>x</sup>                |
|                                                   | SMAC_07180 | <i>nuo21</i>                           | Subunit of complex I (mitochondrial respiration) <sup>x</sup>                |
|                                                   | SMAC_08634 | <i>nuo14</i>                           | Subunit of complex I (mitochondrial respiration) <sup>x</sup>                |
| Downregulated                                     | SMAC_12686 | <i>ATP synthase subunit 6</i>          | Mitochondrial ATPase <sup>z</sup>                                            |
|                                                   | SMAC_12688 | <i>ATP synthase subunit 9</i>          | Mitochondrial ATPase <sup>z</sup>                                            |

<sup>a</sup>(Fu *et al.* 2011); <sup>b</sup>(Berepiki *et al.* 2011); <sup>c</sup>(Dagdas *et al.* 2012); <sup>d</sup>(Chen and Thorner 2007); <sup>e</sup>(Semighini and Harris 2008); <sup>f</sup>(Jones and Bennett 2011); <sup>g</sup>(Echauri-Espinosa *et al.* 2012); <sup>h</sup>(Artiles *et al.* 2009); <sup>i</sup>(Das *et al.* 2013); <sup>j</sup>(Rank and Rayment 2013); <sup>k</sup>(Krappmann *et al.* 2007); <sup>l</sup>(Pulver *et al.* 2013); <sup>m</sup>(Park *et al.* 1997); <sup>n</sup>(Brace *et al.* 2011); <sup>o</sup>(Knaus *et al.* 2007); <sup>p</sup>(Berepiki and Read 2013); <sup>q</sup>(Strieter and Korasick 2012); <sup>r</sup>(van der Veen and Ploegh 2012); <sup>s</sup>(Iino and Noji 2013); <sup>t</sup>(Bailey and Ebbole 1998); <sup>u</sup>(Mayrhofer *et al.* 2006); <sup>v</sup>(Klix *et al.* 2010); <sup>w</sup>(Nolting and Pöggeler 2006); <sup>x</sup>(Tanida 2011); <sup>y</sup>(Duarte and Videira 2000); <sup>z</sup>(Mavridou *et al.* 2013)
