# Supplementary material
Source: PubMed Central journal article supplement (PMC3948803)
Supplement: ee61862f928eecff902fd6785809945b_genetics.113.159368-7.pdf [file ee61862f928eecff902fd6785809945b_genetics.113.159368-7.pdf]

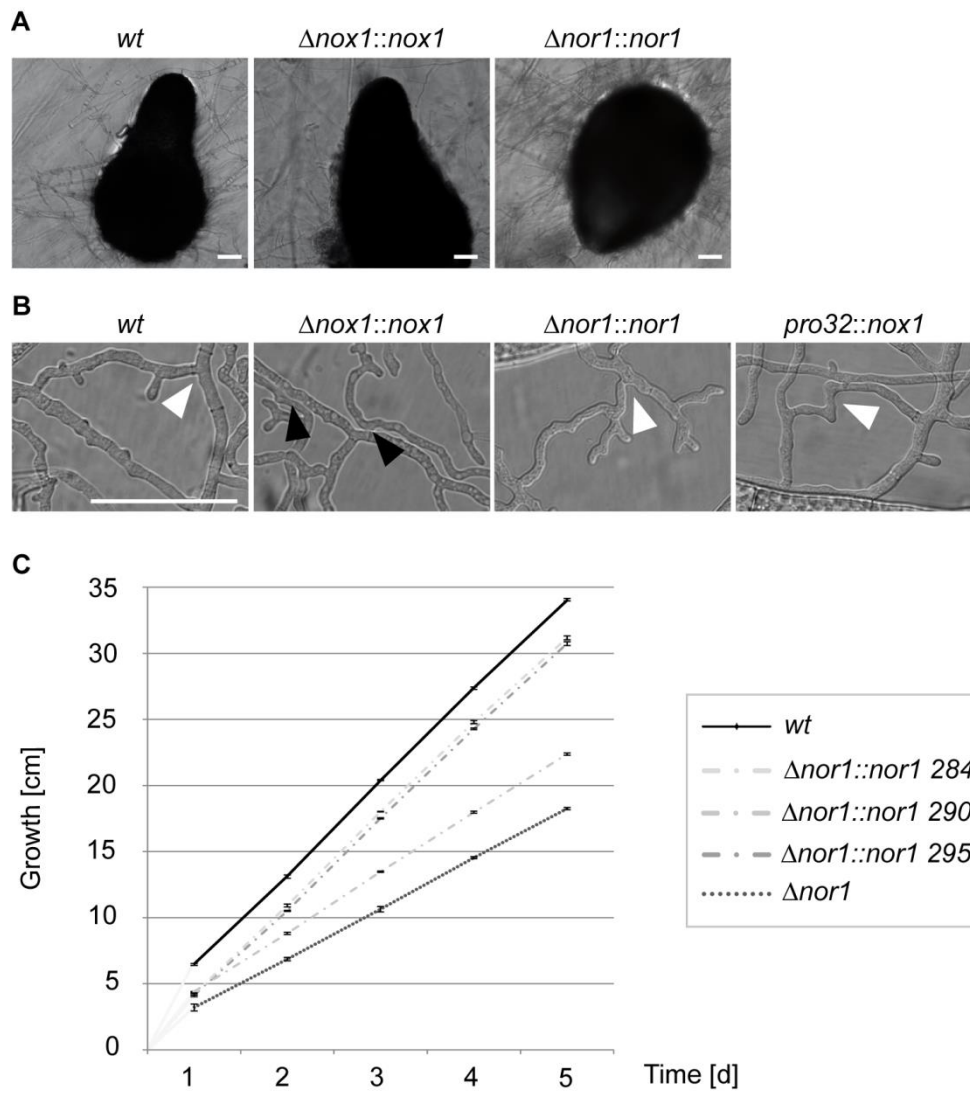

**Figure S4** Phenotypes of complemented  $\Delta nox1$ , *pro32* and  $\Delta nor1$  mutants. (A) Complementation of  $\Delta nox1$  and  $\Delta nor1$  with the corresponding genes results in normal sexual development. The bar is 50  $\mu m$ . (B) Hyphal fusion ability of *pro32* and  $\Delta nor1$  mutants was restored in  $\Delta nor1::nor1$  and *pro32::nox1* but not in fertile  $\Delta nox1::nox1$  complemented strains. Hyphal fusion is indicated by white arrowheads; the lack of hyphal fusion is marked by black arrowheads. The bar is 50  $\mu m$ . (C) Normal growth was restored in  $\Delta nor1::nor1$  as it was in  $\Delta nox1::nox1$  complemented strains. Growth was followed in race tubes for 6 days in three replicates.
